# Supplementary material for: Ultrasound (US)-activated redox dyshomeostasis therapy reinforced by immunogenic cell death (ICD) through a mitochondrial targeting liposomal nanosystem
Source: PubMed Central journal article supplement (PMC8490505; doi:10.7150/thno.62984), 2021-09-13
Supplement: thnov11p9470s1.pdf [file thnov11p9470s1.pdf]

# Supporting Information

Ultrasound (US)-activated redox dyshomeostasis therapy reinforced by immunogenic cell death (ICD) through a mitochondrial targeting liposomal nanosystem

Junjie Ren<sup>a</sup>, Jing Zhou<sup>a</sup>, Han Liu<sup>a</sup>, Xiaodan Jiao<sup>a</sup>, Yang Cao<sup>b</sup>, Zhigang Xu<sup>a</sup>, Yuejun Kang<sup>a,\*</sup>, Peng Xue<sup>a,\*</sup>

<sup>a</sup> State Key Laboratory of Silkworm Genome Biology, School of Materials and Energy, Southwest University, Chongqing 400715, China.

<sup>b</sup> Chongqing Key Laboratory of Ultrasound Molecular Imaging, Institute of Ultrasound Imaging, Second Affiliated Hospital, Chongqing Medical University, Chongqing 400010, China.

**Corresponding author:** xuepeng@swu.edu.cn (P. Xue), yjkang@swu.edu.cn (Y. Kang)

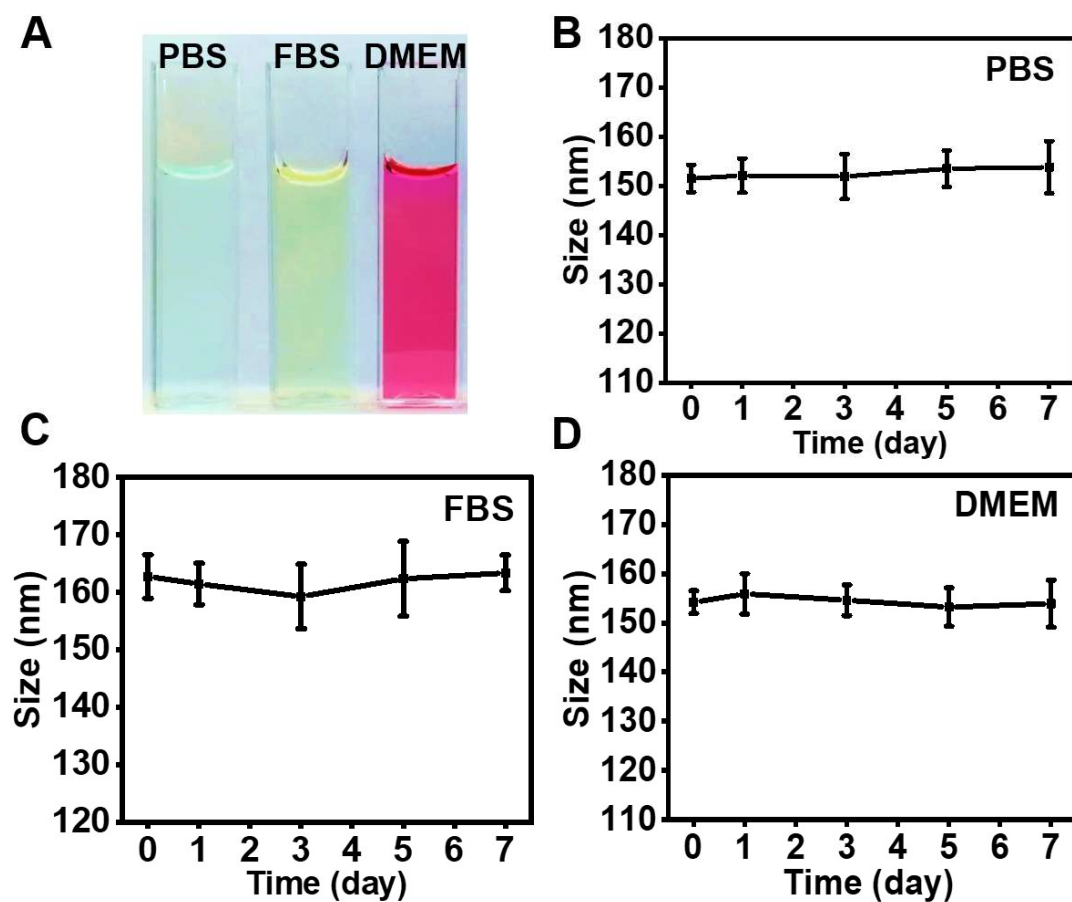

**Figure S1.** Long-term storage stability of MLipRIR NPs. (A) Digital photographs of MLipRIR NPs dispersed in PBS, FBS (10%) or DMEM (with 10% FBS). Size change of MLipRIR NPs in (B) PBS, (C) FBS (10%) and (D) DMEM during an incubation for seven days at 37°C (n = 4).

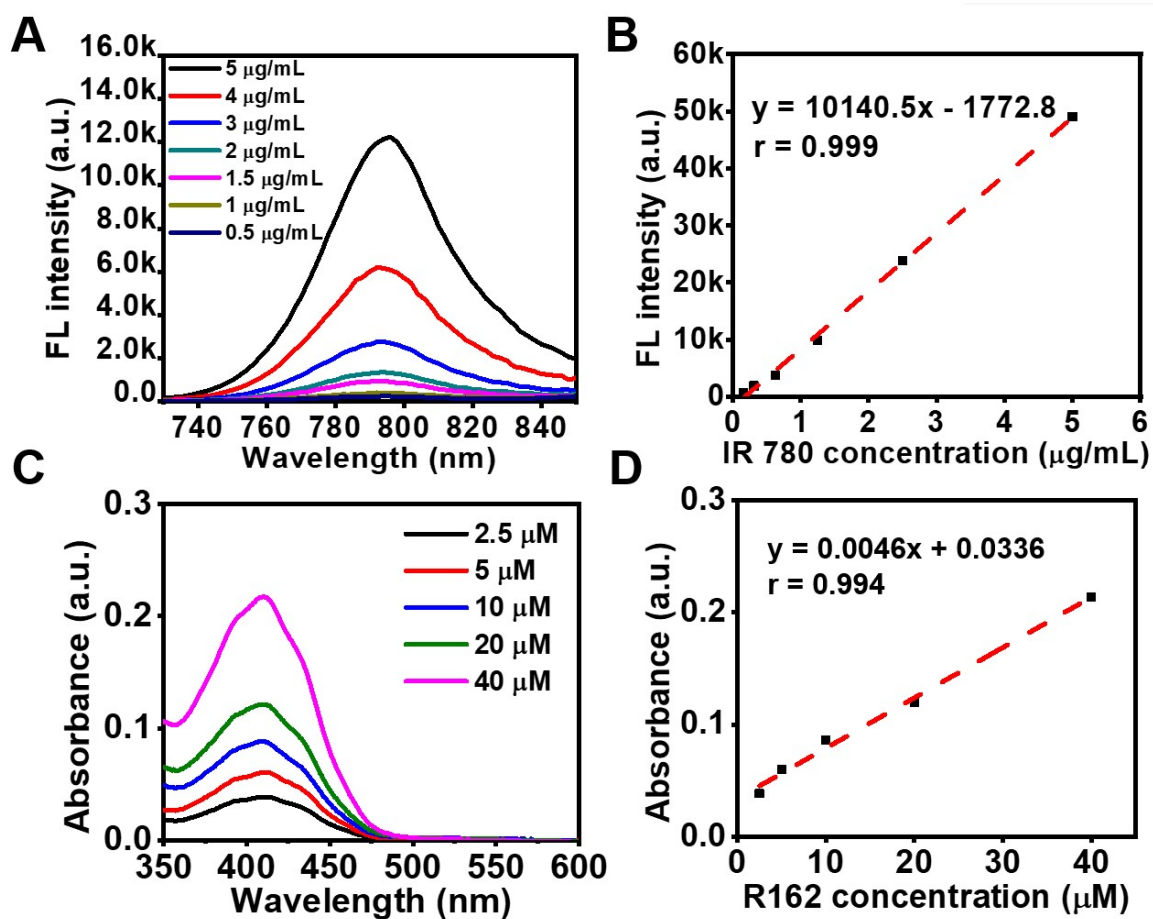

**Figure S2.** Calibration curves of free IR780 and R162. **(A)** Fluorescence spectra and **(B)** fluorescence intensity ( $\lambda_{ex}/\lambda_{em} = 650/780$  nm) of IR780 at various concentrations. **(C)** UV-vis-NIR absorption spectra and **(D)** absorbance ( $\lambda_{max} = 410$  nm) of R162 at various concentrations.

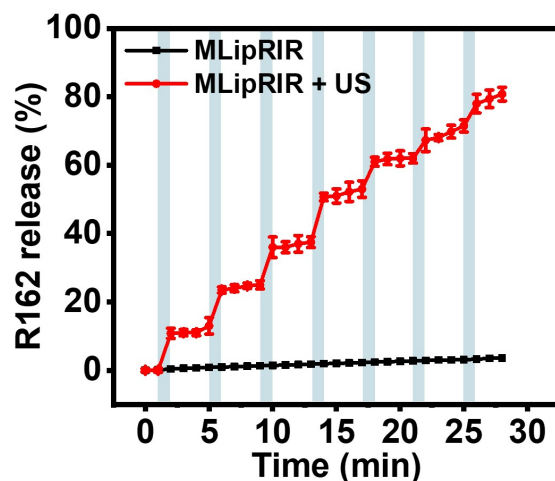

**Figure S3.** Cumulative release of R162 from MLipRIR NPs under the condition mimicking TME (pH: 6.8, 37 °C) *in vitro*. Blue hatched time slots represent the US-irradiation period (1.0 MHz, 1.5 W/cm<sup>2</sup>, 50% duty cycle; 1 min irradiation for each cycle).

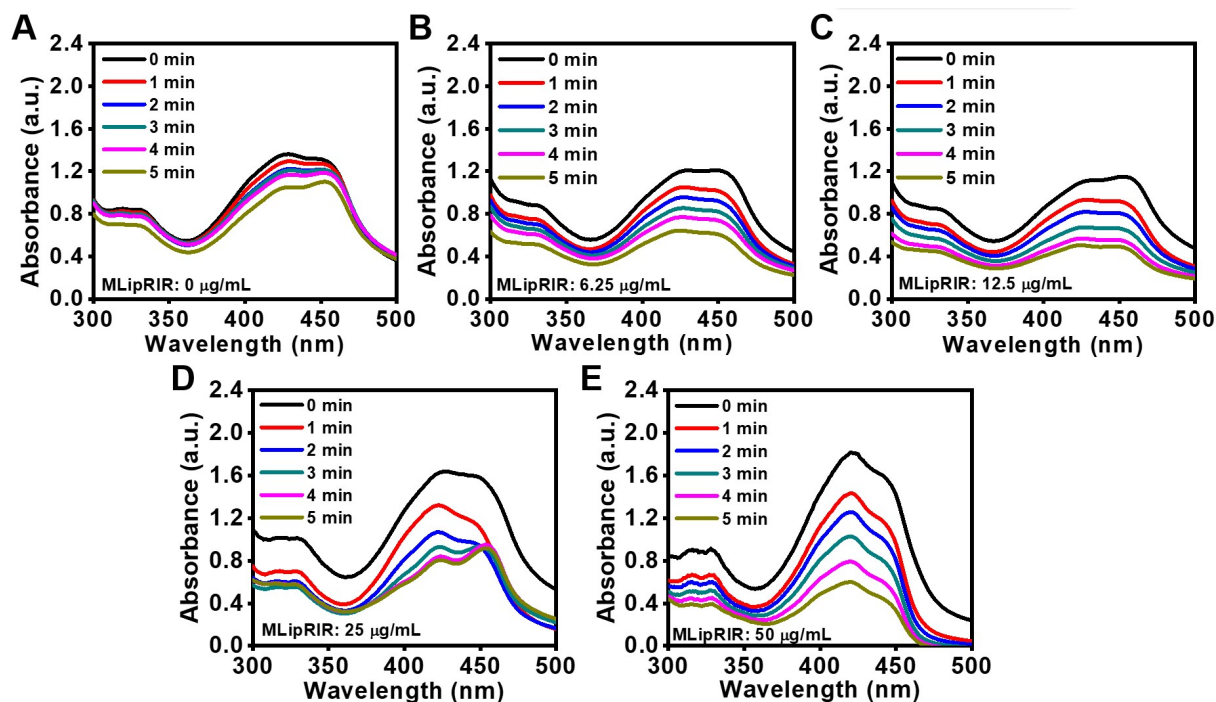

**Figure S4.** UV-vis absorption spectra of DPBF containing MLipRIR NPs with the concentration of (A) 0 µg/mL, (B) 6.25 µg/mL, (C) 12.5 µg/mL, (D) 25 µg/mL and (E) 50 µg/mL, subject to US irradiation for various periods (0-5 min) corresponding to Figure 11.

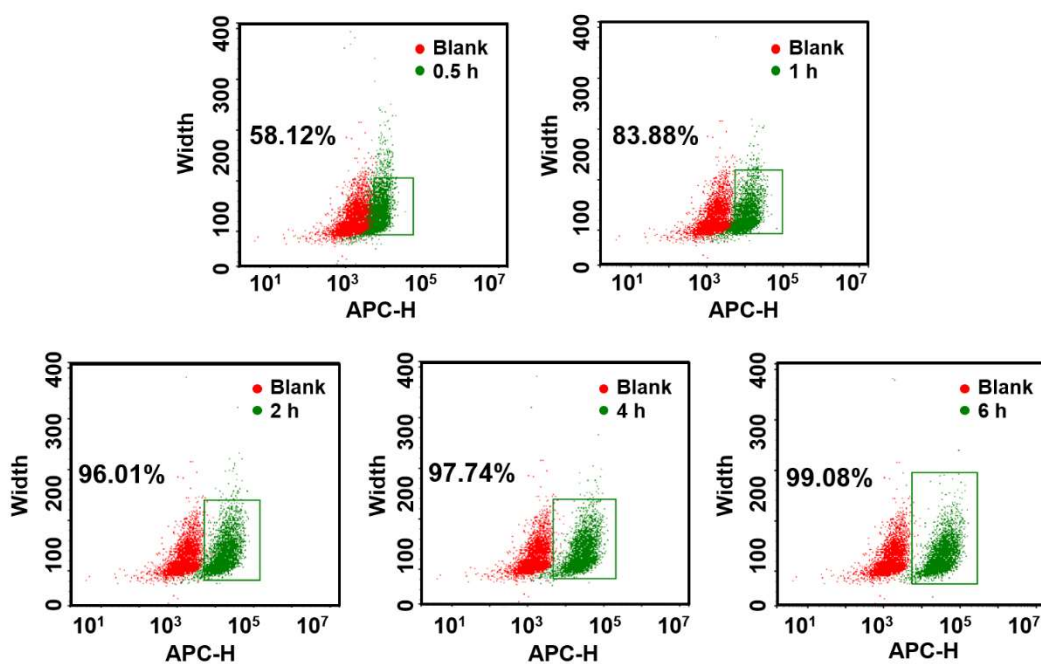

**Figure S5.** Flow cytometry dot plots of 4T1 cells after being incubated with MLipRIR NPs for different periods corresponding to Figure 2B.

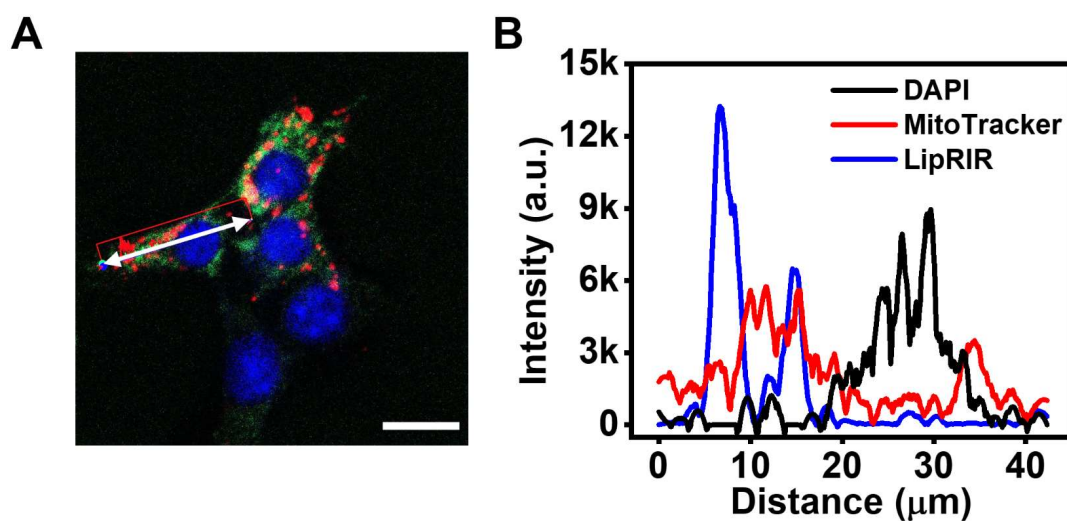

**Figure S6.** (A) Feature confocal image of 4T1 cells after incubation with LipRIR NPs for 4 h (scale bar: 20  $\mu\text{m}$ ). Fluorescence of DAPI, MitoTracker Green and LipRIR NPs was displayed by pseudo-colored blue, green and red, respectively. (B) Fluorescence intensity of individual DAPI, MitoTracker Green and MLipRIR NP channels along with the white auxiliary line marked in (A).

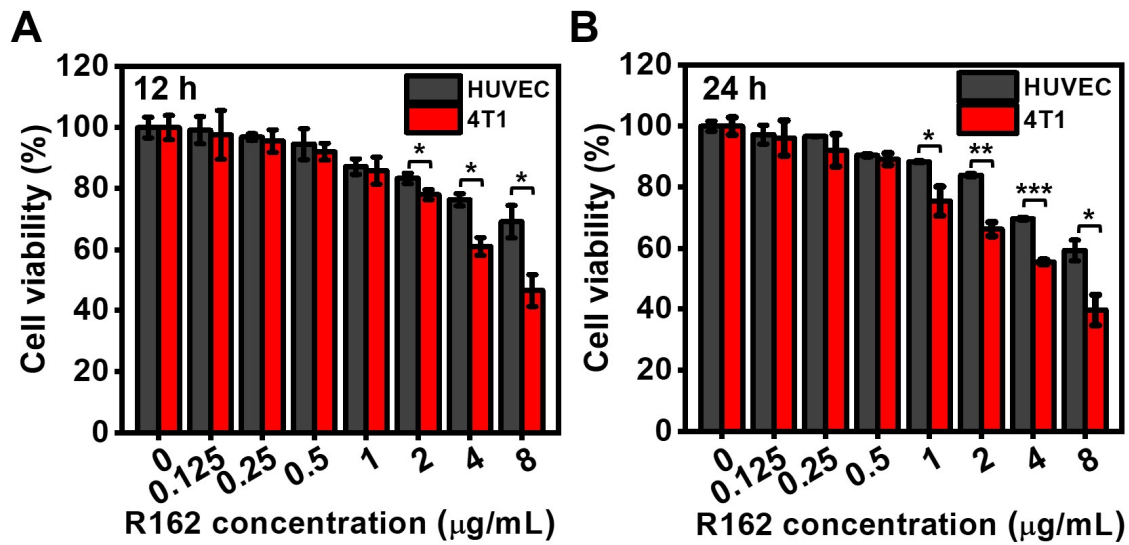

**Figure S7.** Viability of HUVEC and 4T1 cells after administered with MLipRIR NPs at various concentrations for (A) 12 h and (B) 24 h (\* $p < 0.05$ , \*\* $p < 0.01$  and \*\*\* $p < 0.001$  between two groups).

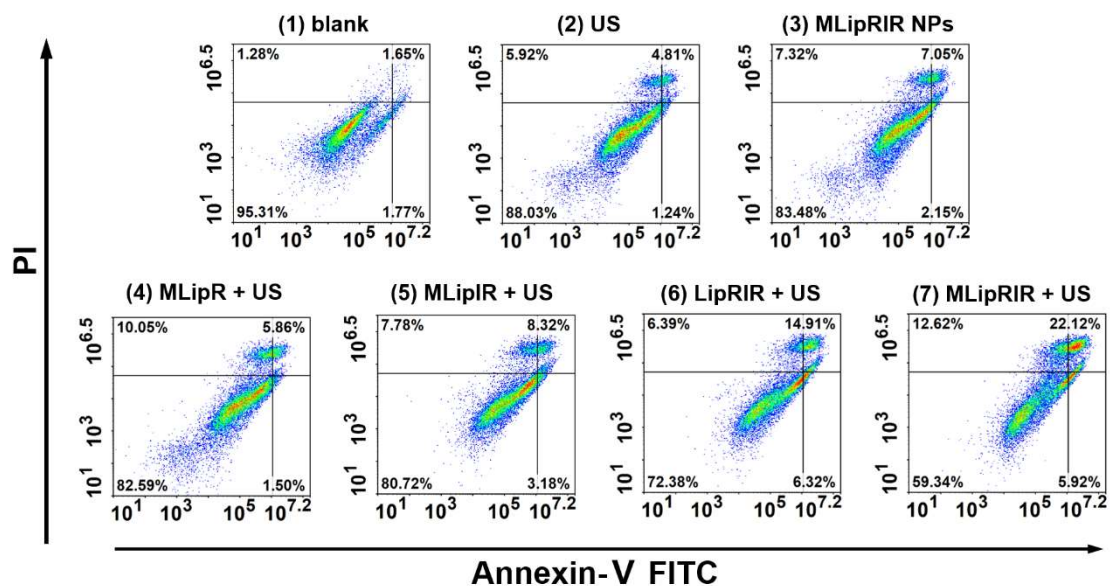

**Figure S8.** Apoptotic status of 4T1 cells after receiving various treatments and stained by Annexin V-FITC/PI, followed by quantitative analysis using flow cytometry.

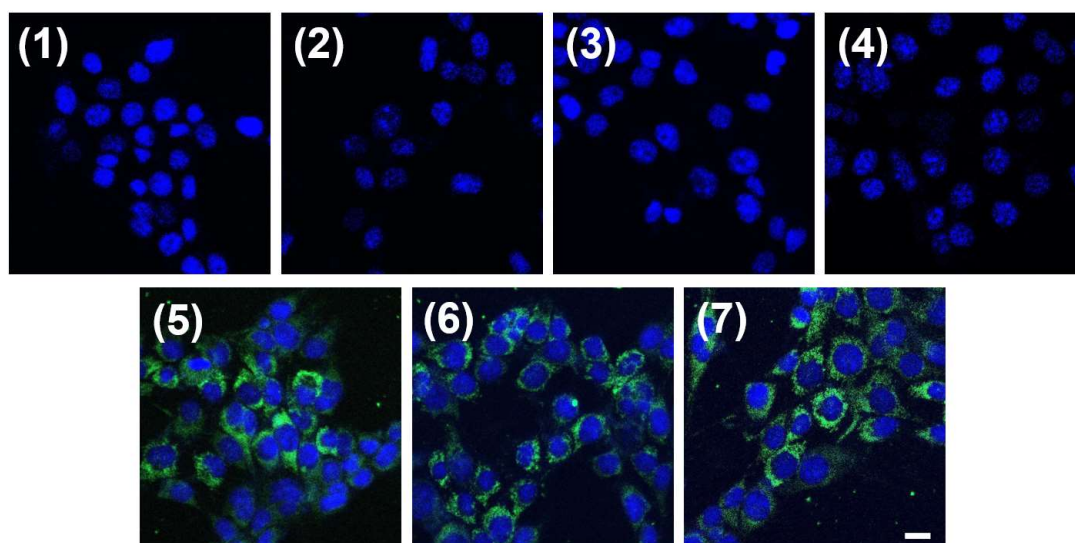

**Figure S9.** Confocal microscopic images of 4T1 cells pre-stained by LiperFluo and subject to different treatments corresponding to Figure 5G (scale bar: 20  $\mu$ m). Groups are assigned to be (1) blank, (2) US, (3) MLipRIR NPs, (4) MLipR + US, (5) MLipIR + US, (6) LipRIR + US, and (7) MLipRIR + US.

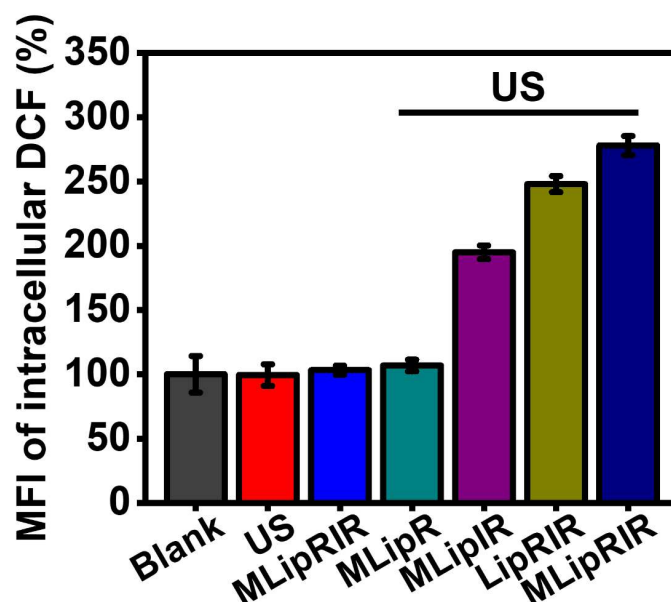

**Figure S10.** Mean fluorescence intensity (MFI) of intracellular DCF after various treatments toward 4T1 cells corresponding to Figure 3I.

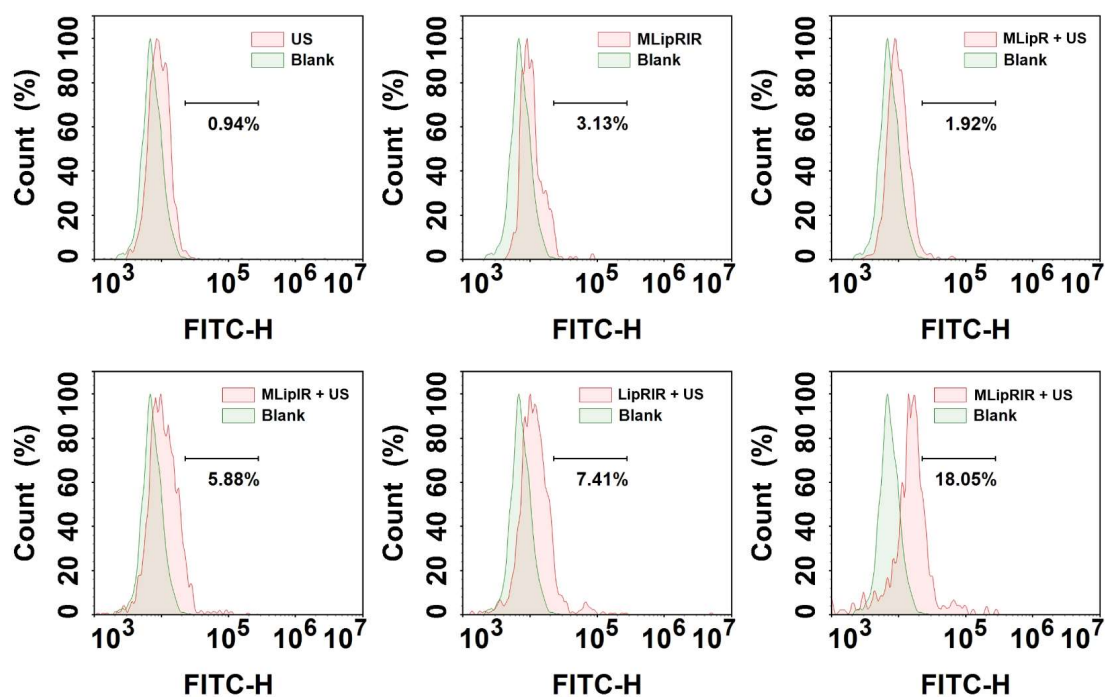

**Figure S11.** CRT expression level in the plasma membrane of 4T1 cells after various treatments through flow cytometry analysis.

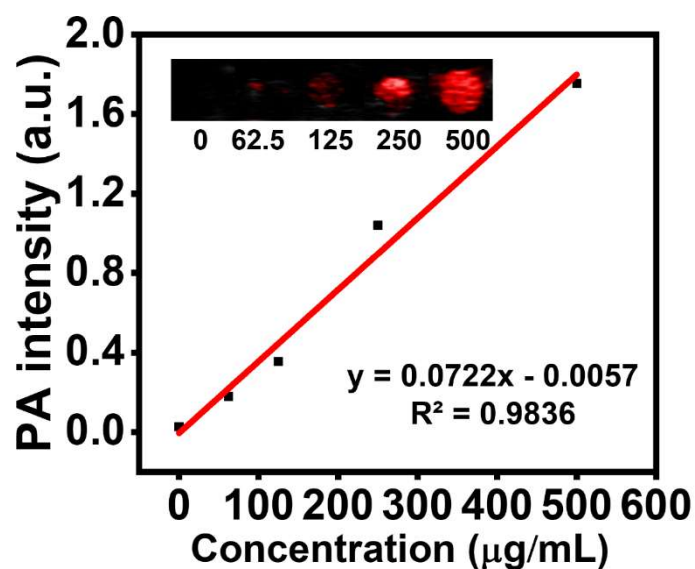

**Figure S12.** Calibration curve of PA intensity as a function of MLipRIR concentration (ranging up to 500 μg/mL). Inset: PA image of MLipRIR dispersion with different concentrations.



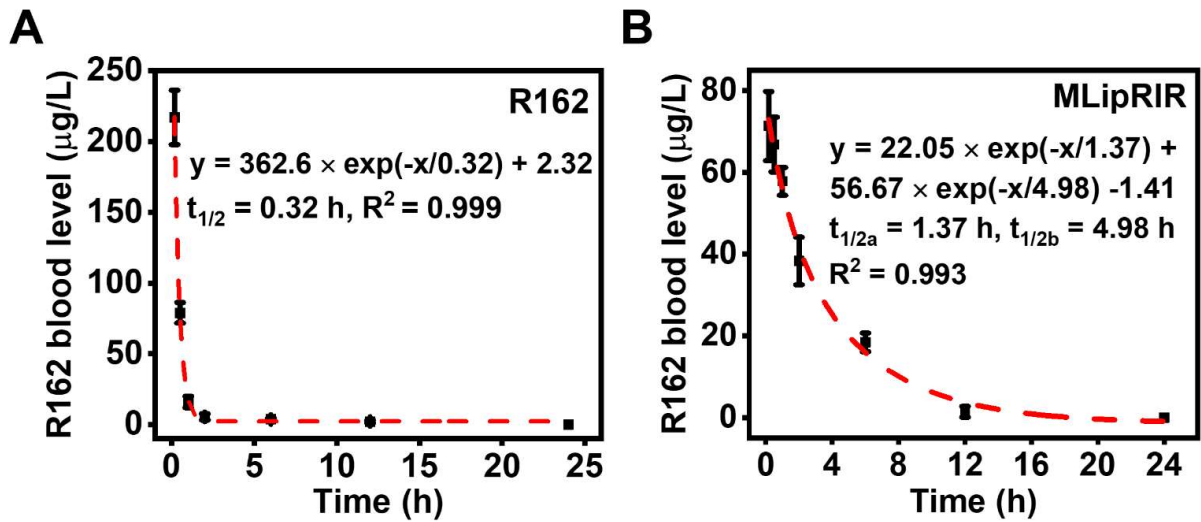

**Figure S13.** Pharmacokinetics of R162 *in vivo*. R162 blood level over 24 h after intravenous injection of (A) free R162 or (B) MLipRIR NPs (100  $\mu\text{L}$ , equivalent R162 dosage at 0.5 mg/kg, in saline) into KM mice.

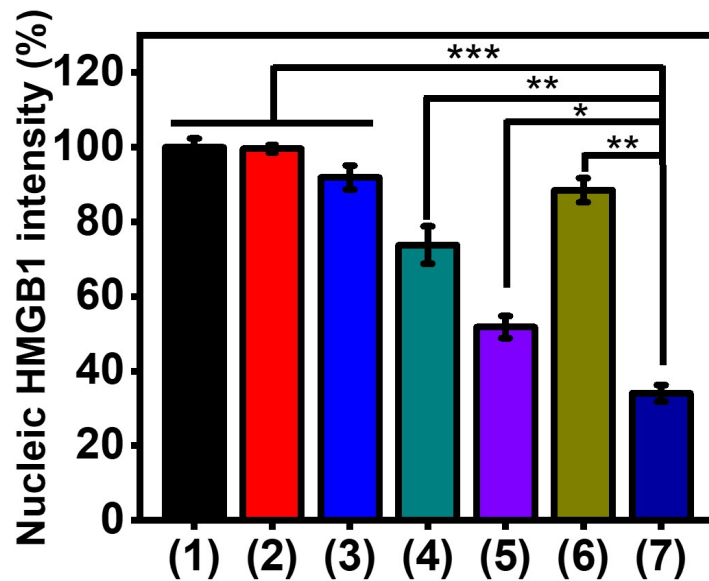

**Figure S14.** Quantitative remnant HMGB1 level in nucleic region of 4T1 tumor section from various groups corresponding to Figure 5H. \* $p < 0.05$ , \*\* $p < 0.01$  and \*\*\* $p < 0.001$  between two groups.

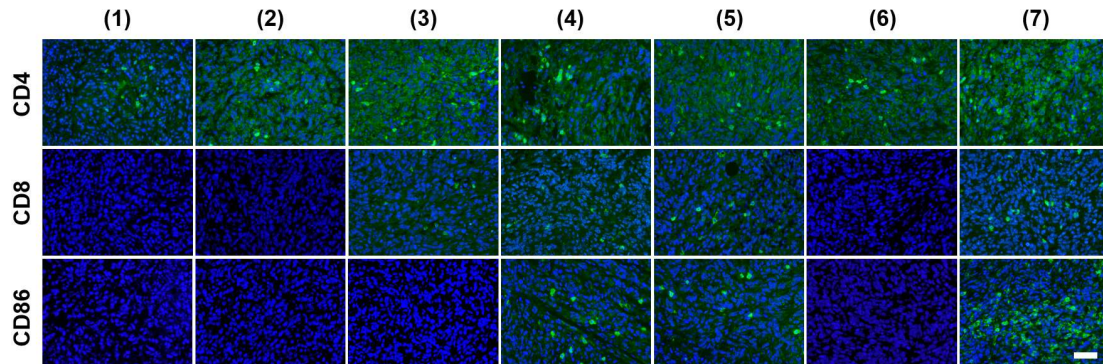

**Figure S15.** Representative confocal microscopic images of tumor slices with immunofluorescence staining against CD4, CD8 and CD86 on day 14 after various treatments, corresponding to the groups in Figure 5 (scale bar: 50  $\mu\text{m}$ ).

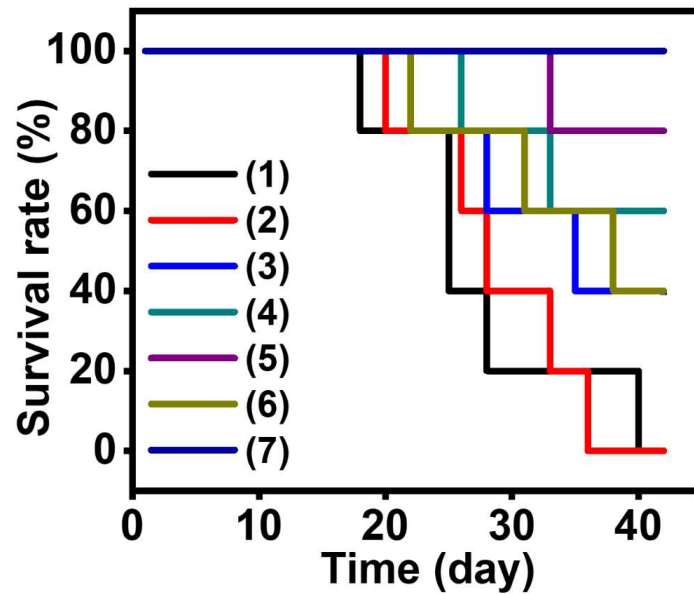

**Figure S16.** Survival rates of 4T1 tumor-bearing mice subject to various treatments corresponding to Figure 5 (n = 5).

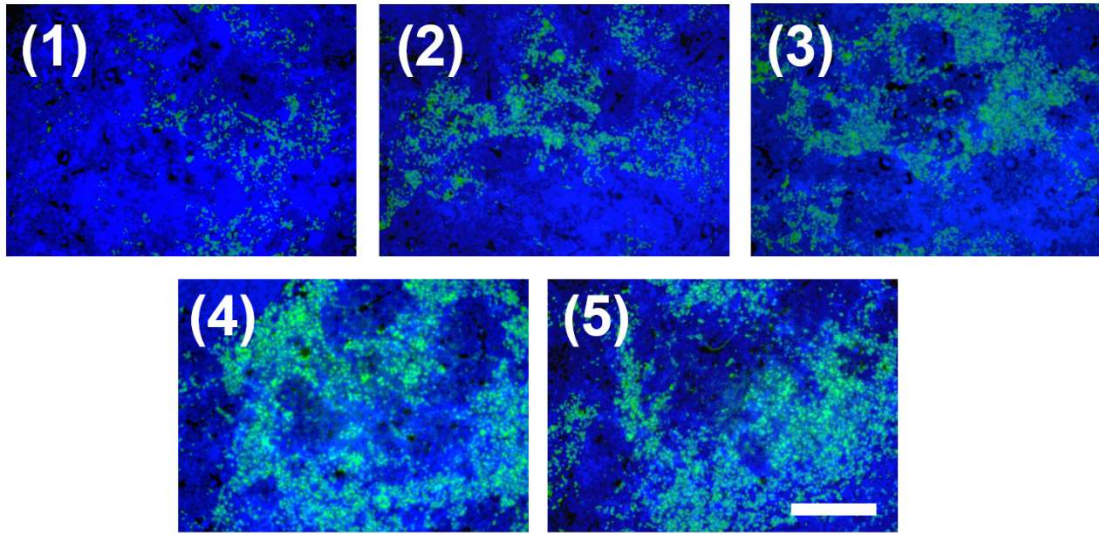

**Figure S17.** Representative confocal images of spleen slices with immunofluorescence staining against CD8 on day 14 after various treatments, corresponding to the groups in Figure 6 (scale bar: 100  $\mu\text{m}$ ).

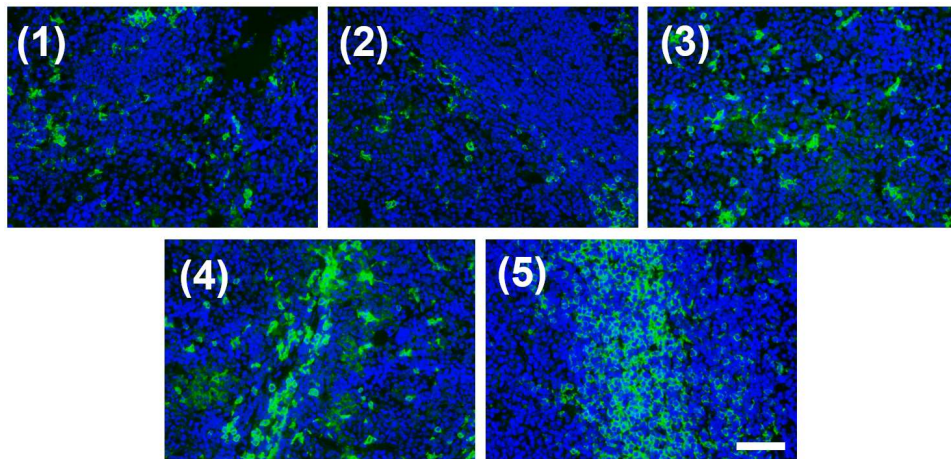

**Figure S18.** Representative confocal microscopic images of spleen slices with immunofluorescence staining against CD86 on day 14 after various treatments, corresponding to the groups in Figure 6 (scale bar: 50  $\mu\text{m}$ ).

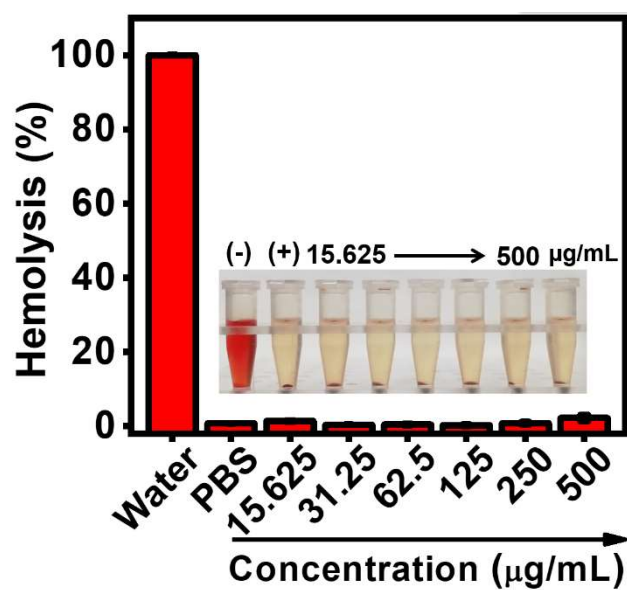

**Figure S19.** Hemolytic rate of red blood cells (RBCs) after incubating with MLipRIR NPs at different concentrations for 6 h at 37 °C. DI water and PBS served as positive and negative references, respectively. Inset: photograph of the centrifuge tubes containing various samples.

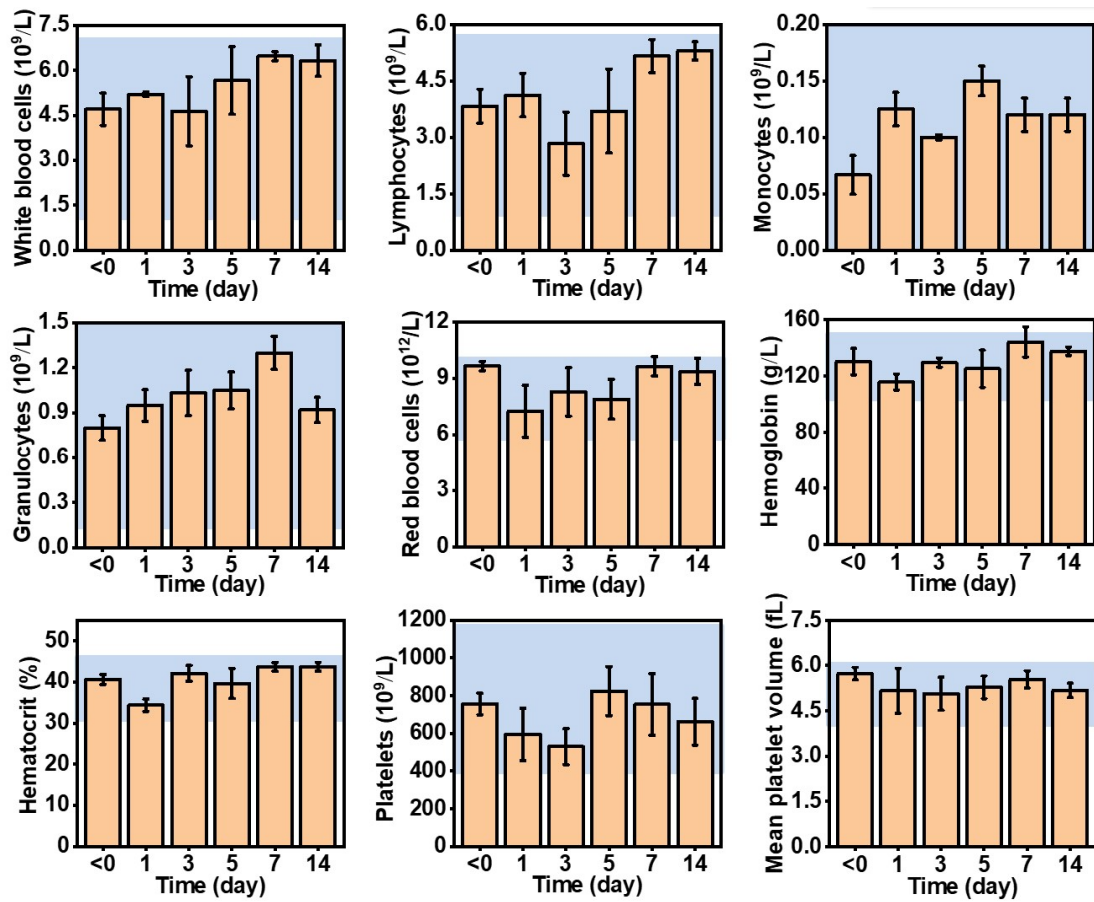

**Figure S20.** Primary indicators of routine blood test after KM mice being injected with MLipRIR NPs (equivalent R162 concentration at 0.5 mg/kg). The blue hatched areas represent the normal reference ranges of hematology data of healthy mice.

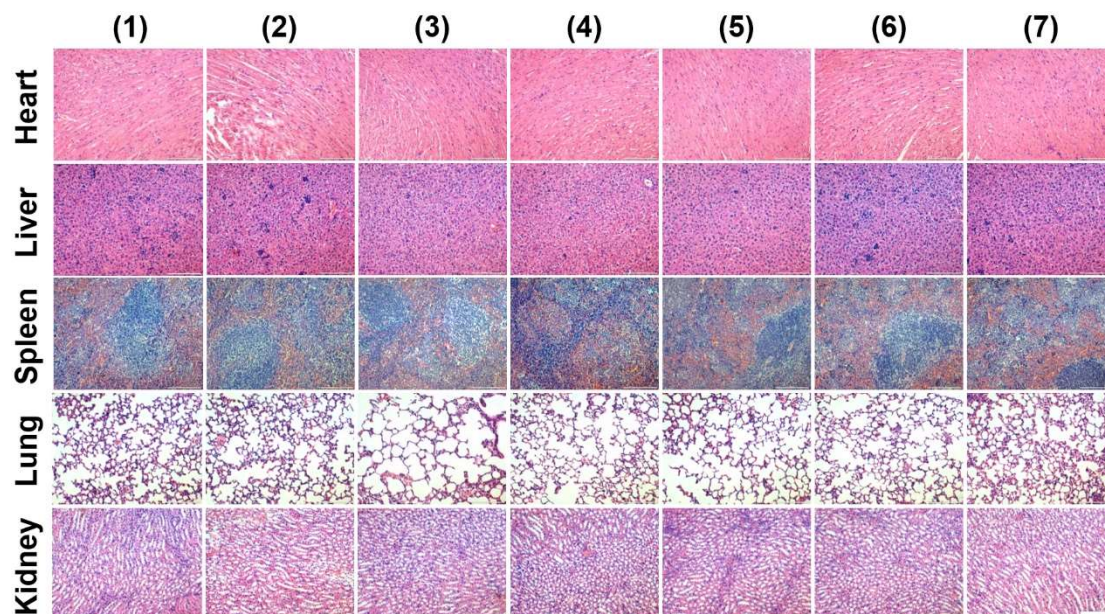

**Figure S21.** Histopathological analysis of vital organs (heart, liver, spleen, lung and kidney) harvested on day 14 through H&E staining, corresponding to the groups in Figure 5 (scale bar: 100  $\mu\text{m}$ ).

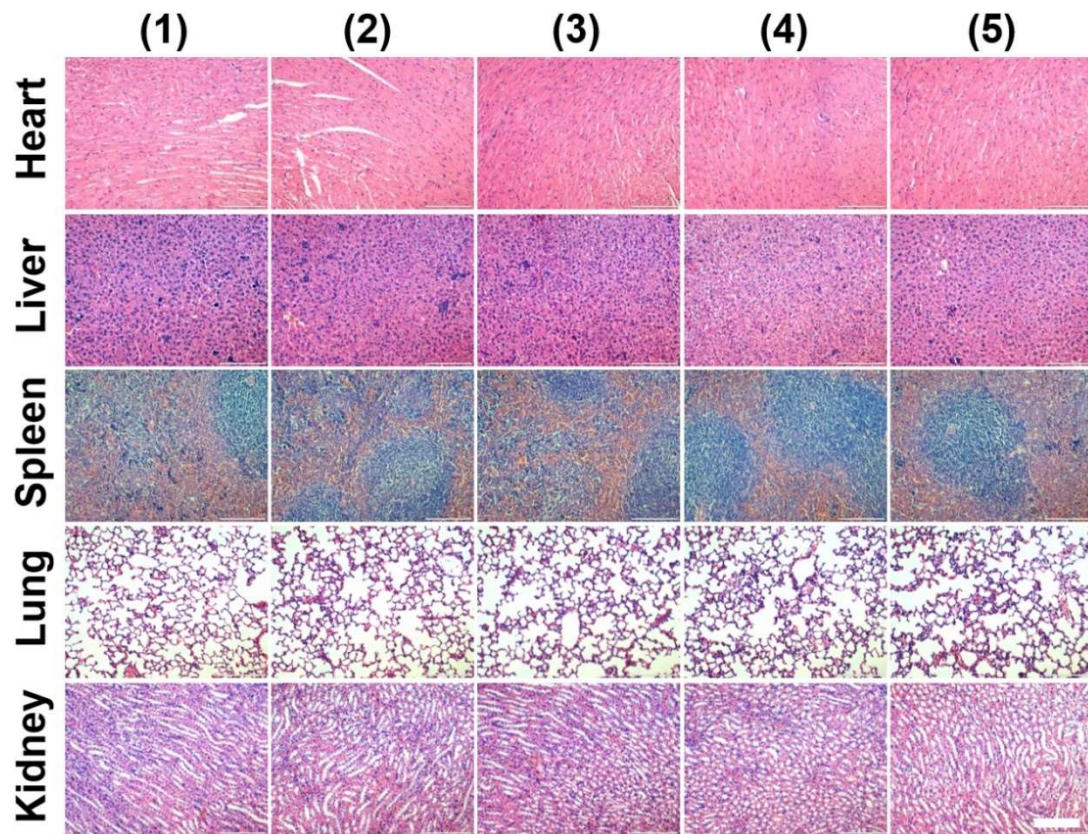

**Figure S22.** Histopathological analysis of vital organs (heart, liver, spleen, lung and kidney) harvested on day 14 through H&E staining, corresponding to the groups in Figure 6 (scale bar: 100  $\mu$ m).
